# Supplementary material for: Ценообразование в «Зелёной экономике»
Source: Royal Society of Chemistry journal article supplement (doi:10.1039/c5cp02362a), 2012-01-01
Supplement: c5cp02362a1.pdf [file c5cp02362a1.pdf]

## Supplementary Information

### To what extent can charge localization influence electron injection efficiency at graphene-porphyrin interfaces?

Manas R. Parida,<sup>a</sup> Shawkat M. Aly,<sup>†a</sup> Erkki Alarousu,<sup>a</sup> Aravindan Sridharan,<sup>a</sup> Doddahalli H. Nagaraju,<sup>b</sup> Husam N. Alshareef,<sup>b</sup> and Omar F. Mohammed<sup>\*a</sup>

<sup>a</sup>Solar and Photovoltaics Engineering Research Center, Division of Physical Sciences and Engineering, King Abdullah University of Science and Technology, Thuwal 23955-6900, Kingdom of Saudi Arabia; <sup>b</sup> Material Science and Engineering, King Abdullah University of Science and Technology (KAUST), Thuwal 23955-6900, Saudi Arabia .E-mail: omar.abdelsaboer@kaust.edu.sa.

#### Table of Contents

1. Experimental details
2. Steady-state absorption titration of CD with GC
3. Raman spectra of TMPyP and TMPyP-CD-GC mixture
4. Femtosecond TA spectra recorded after 475 nm pulsed laser 120 fs excitation for TMPyP, TMPyP-CD and TMPyP-CD-GC
5. Time correlated single photon counting (TCSPC) kinetics excitation at 475 nm
6. Femtosecond TA showing the ground state bleach of GC in TMPyP-CD-GC
7. Femtosecond TA of TMPyP-CD-GC showing NIR region
8. Cyclic Voltammetry results for TMPyP, TMPyP-CD, and TMPyP-CD-GC

## Experimental Section.

**Materials.** 5,10,15,20-tetra(1-methyl-4-pyridino)-porphyrin tetra(p-toluenesulfonate) (TMPyP) was supplied by Frontier Scientific. Graphene Carboxylate (GC) purchased from ACS Materials.  $\beta$ -Cyclodextrin (CD) purchased from sigma Aldrich.

## Instrumentation

**Stationary Spectroscopy.** Absorption spectra were measured on a Cary 5000 UV-VIS-NIR spectrophotometer (Varian Inc.), while the steady-state photoluminescence spectra were measured using a Jobin-Yvon-Horiba Fluoromax-4 spectrofluorometer.

**Raman Spectroscopy.** Raman spectra were measured on a LabRam Aramis Raman spectrometer from Horiba Jobin Yvon, using a laser wavelength of 473 nm and an integration time of 60 seconds.

**Time-resolved Spectroscopy.** Time-resolved absorption decays were measured with a pump-probe setup in which a white light continuum probe pulse was generated in a 2 mm-thick sapphire plate contained in an Ultrafast System LLC spectrometer by pulse energy of a few  $\mu$ J. The fundamental output came from a Ti:Sapphire femtosecond regenerative amplifier operating at 800 nm with 35 fs pulses and a repetition rate of 1 kHz. Spectrally tunable (240-2600 nm) femtosecond pulses generated by an Optical Parametric Amplifier (Light Conversion LTD) and a white light continuum were used, respectively, as the pump (excitation)- and probe beams in the pump-probe experimental setup (Helios).

**Cyclic Voltammetry.** Cyclic voltammetry (CV) was carried out using 10 mM  $K_4[Fe(CN)_6]$  containing 0.1 M KCl as supporting electrolyte at a scan rate of 50 mV/s. The studies were carried out by VMP3 biologic instrument with a three electrode electrochemical cell comprising of glassy carbon electrode (3 mm dia.) as working electrode, Ag/AgCl (3 mM KCl solution) as reference electrode, and Pt wire as counter electrode.

**Raman Spectra.** The band at  $1364\text{ cm}^{-1}$  assigned to the stretching of the ( $C_{\alpha}$ -N) appears at shifted  $1353\text{ cm}^{-1}$  indicating the less freedom occurred to this vibration upon binding. The band appearing at  $1299\text{ cm}^{-1}$  is assigned to pyridine bending and the  $A_{1g}$  symmetry almost disappears in the TMPyP-CD-GC spectra that indicate the flipping or twisting of the pyridine ring when porphyrin is attached with GC surface.<sup>1</sup> The band at 970 assigned to the in-plane bending of the pyridyl ring also appear with decreased intensity in the TMPyP-CD-GC spectra indicating the permissible bending of the pyridine ring after binding onto GC surface which is considered as absent of metalation process.<sup>1,2</sup> The TMPyP band at  $402\text{ cm}^{-1}$  assigned to in-plane bending of the porphyrin core and pyridine ring, is shifted to  $380\text{ cm}^{-1}$  with a strong shoulder band at  $407\text{ cm}^{-1}$  in the TMPyP-GC spectra, which confirms that the interaction takes place through the porphyrin cavity as well as with the pyridine ring. In the TMPyP spectra, the band appearing at  $332\text{ cm}^{-1}$  assigned to in-plane bending of the porphyrin core, and the  $A_{1g}$  symmetry, also appears in the TMPyP-CD-GC spectra with decreased intensity as a signature of absent of metalation process.<sup>2</sup>

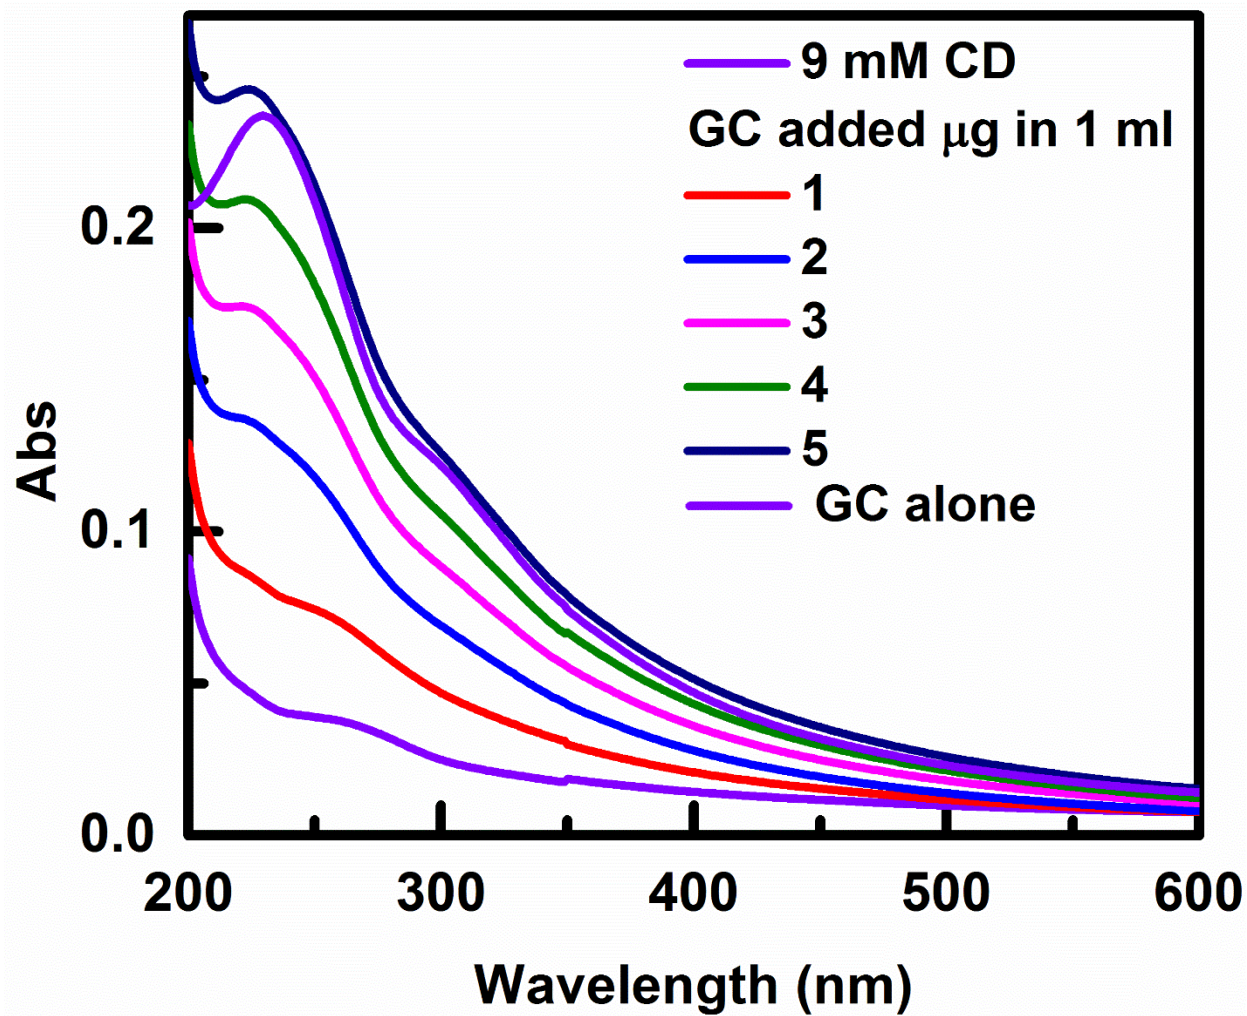

Fig S1. Effect of successive additions of GC (concentration on the graph) on ground-state absorption of CD.

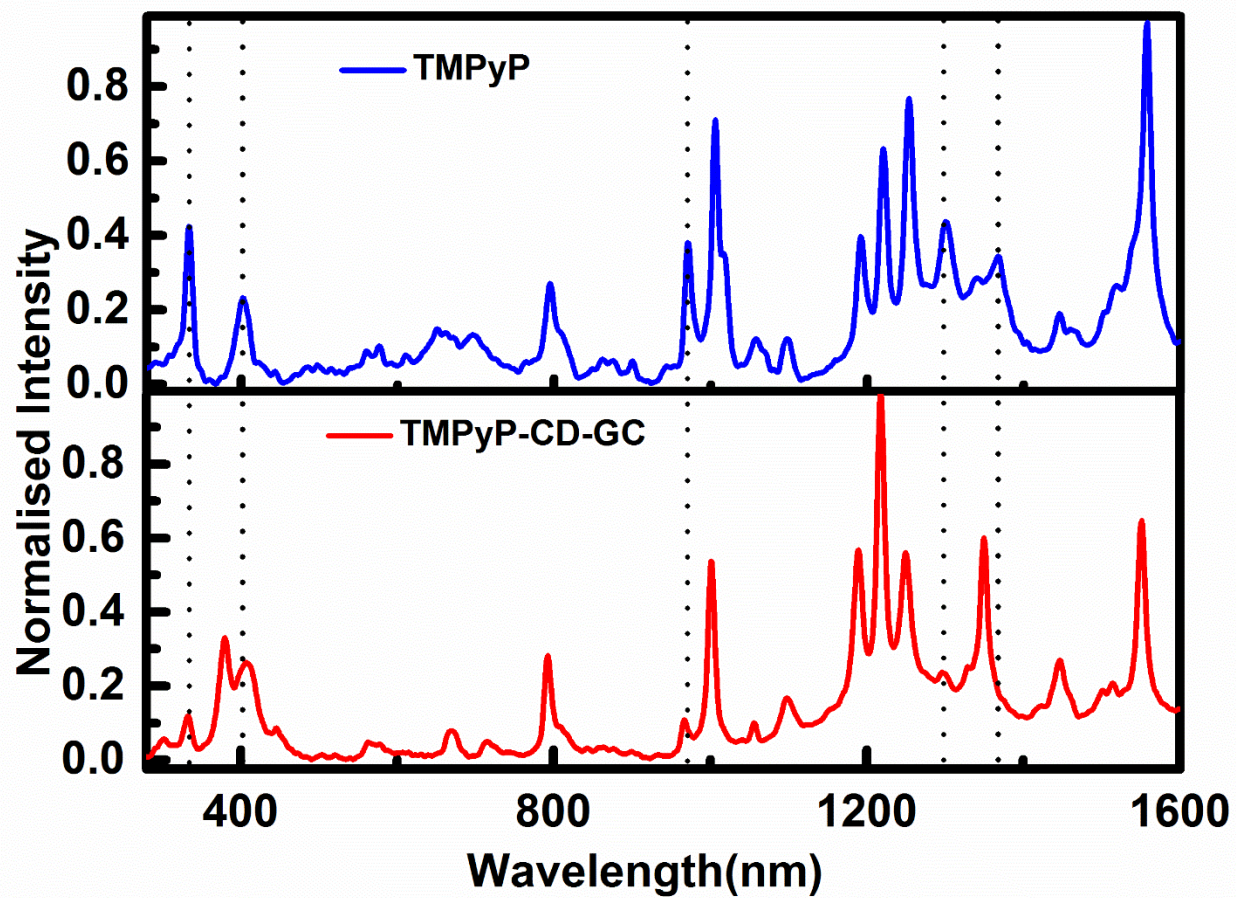

Fig S2. Raman spectra of TMPyP and TMPyP-CD-GC



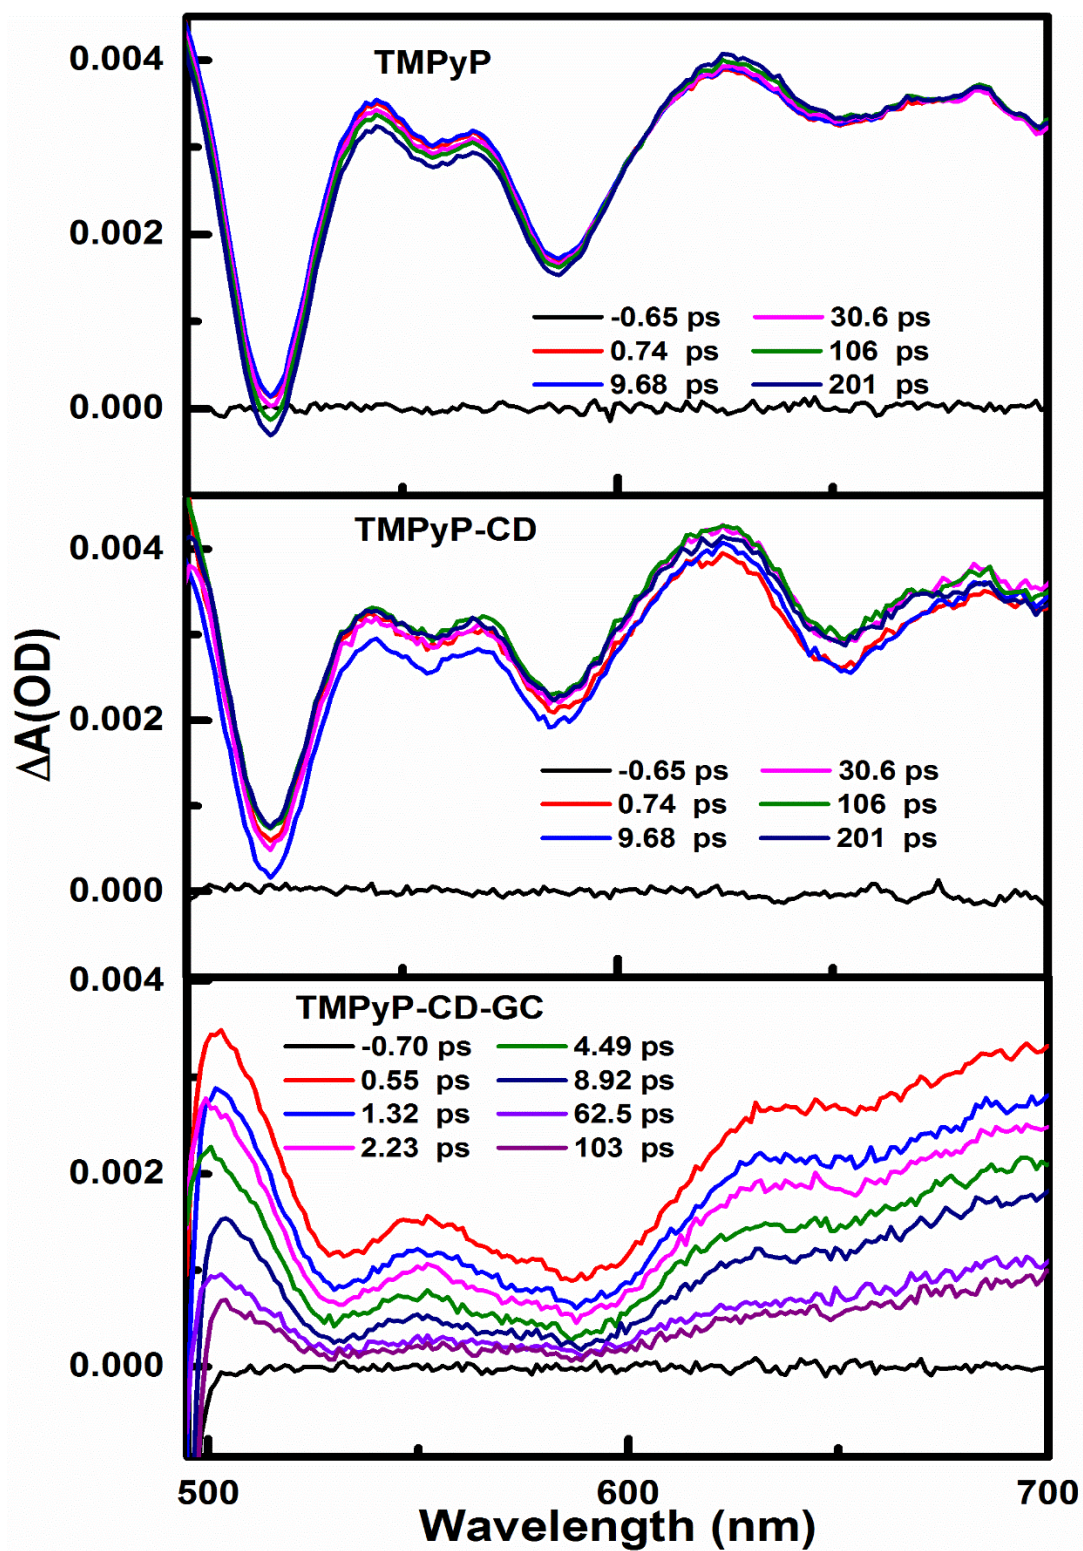

Fig S3. Femtosecond transient absorption spectra recorded after 475 nm pulsed laser 120 fs excitation for TMPyP, TMPyP-CD and TMPyP-CD-GC.

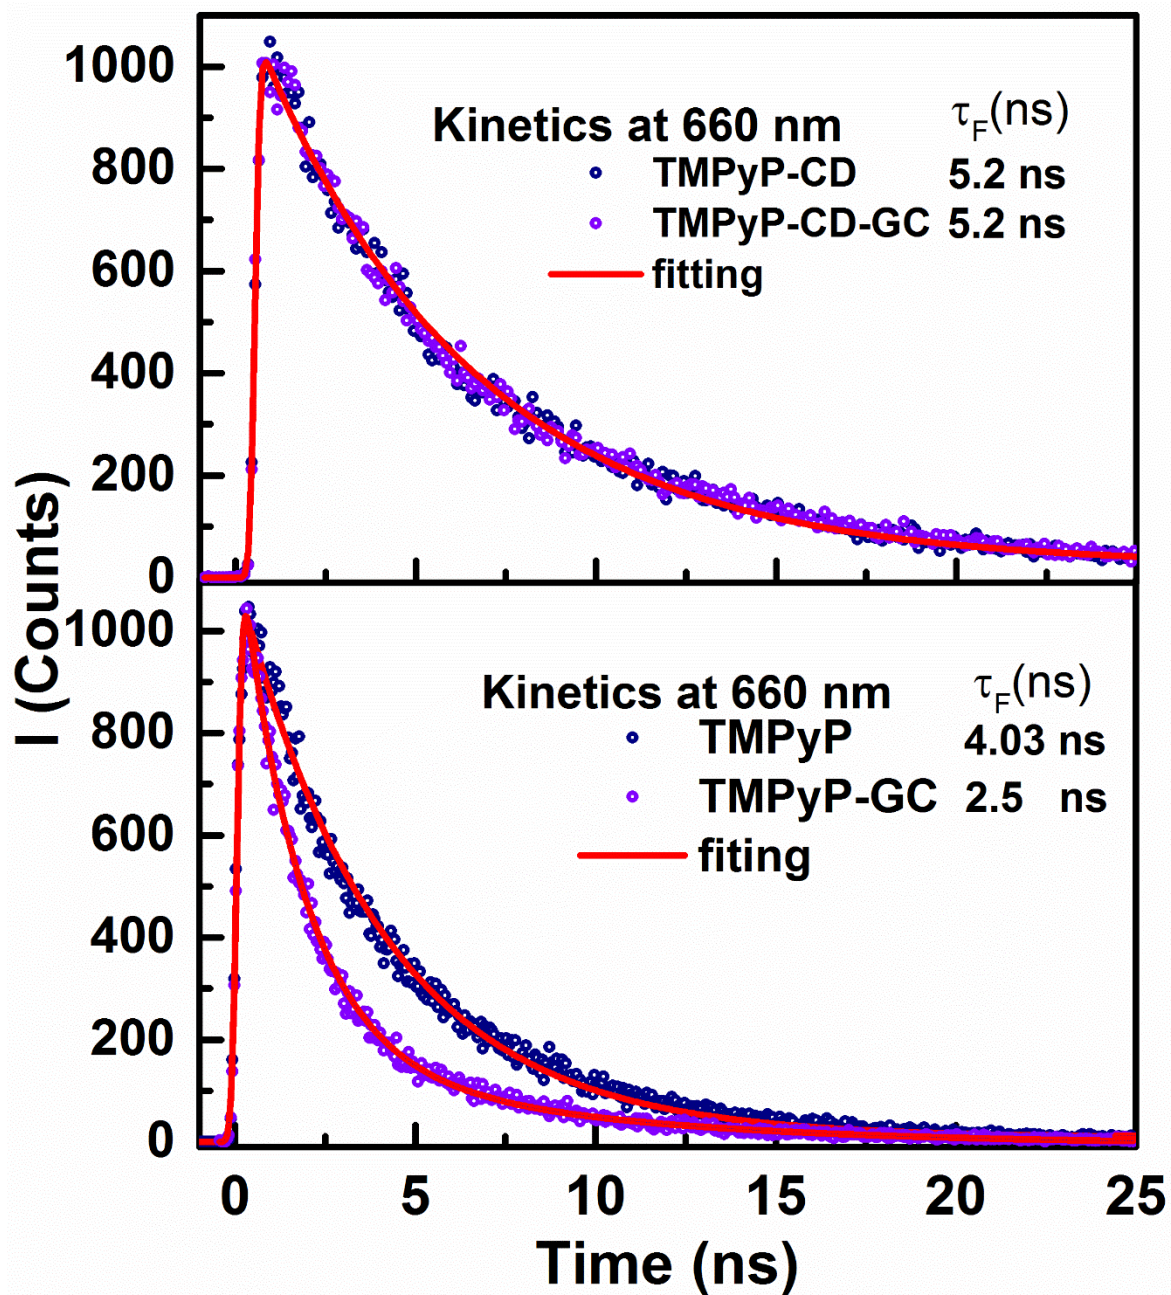

Fig S4. Time correlated single photon counting (TCSPC) kinetics excitation at 475 nm



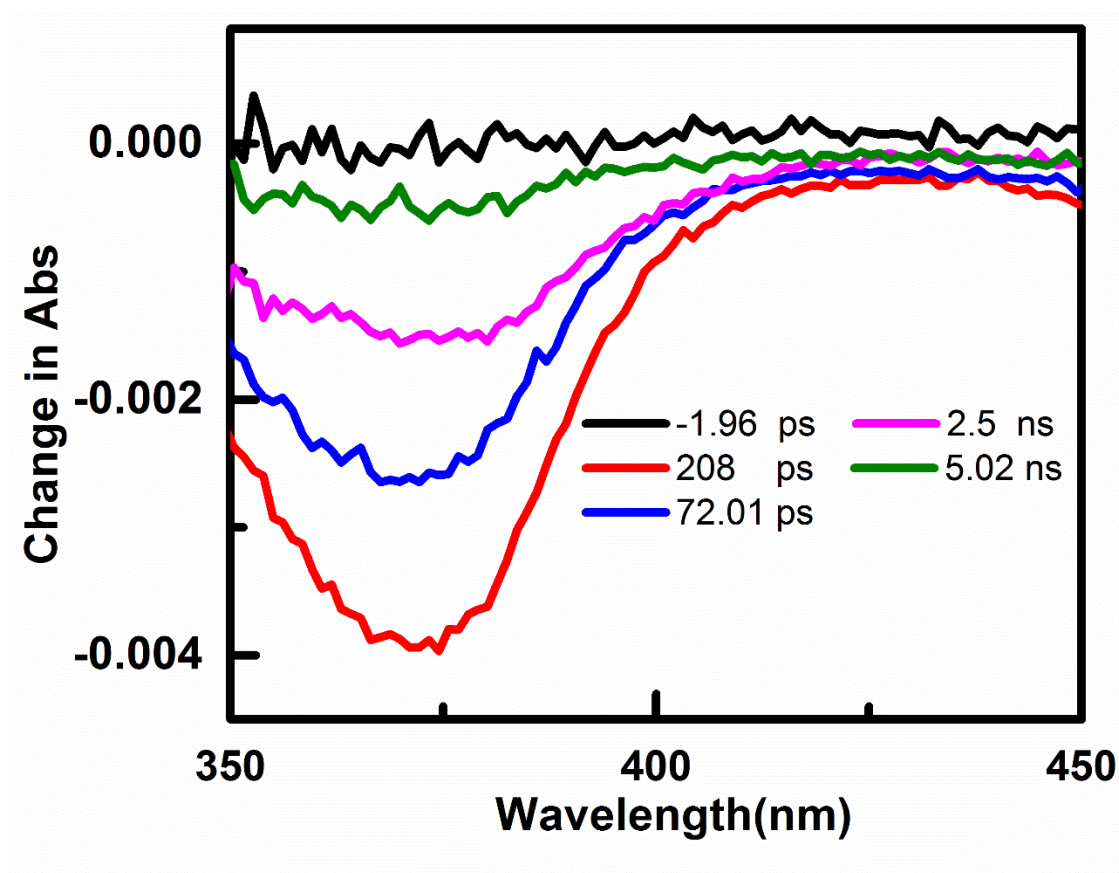

Fig S5. Femtosecond TA showing the ground state bleach of GC in TMPyP-CD-GC after excitation at 650 nm.

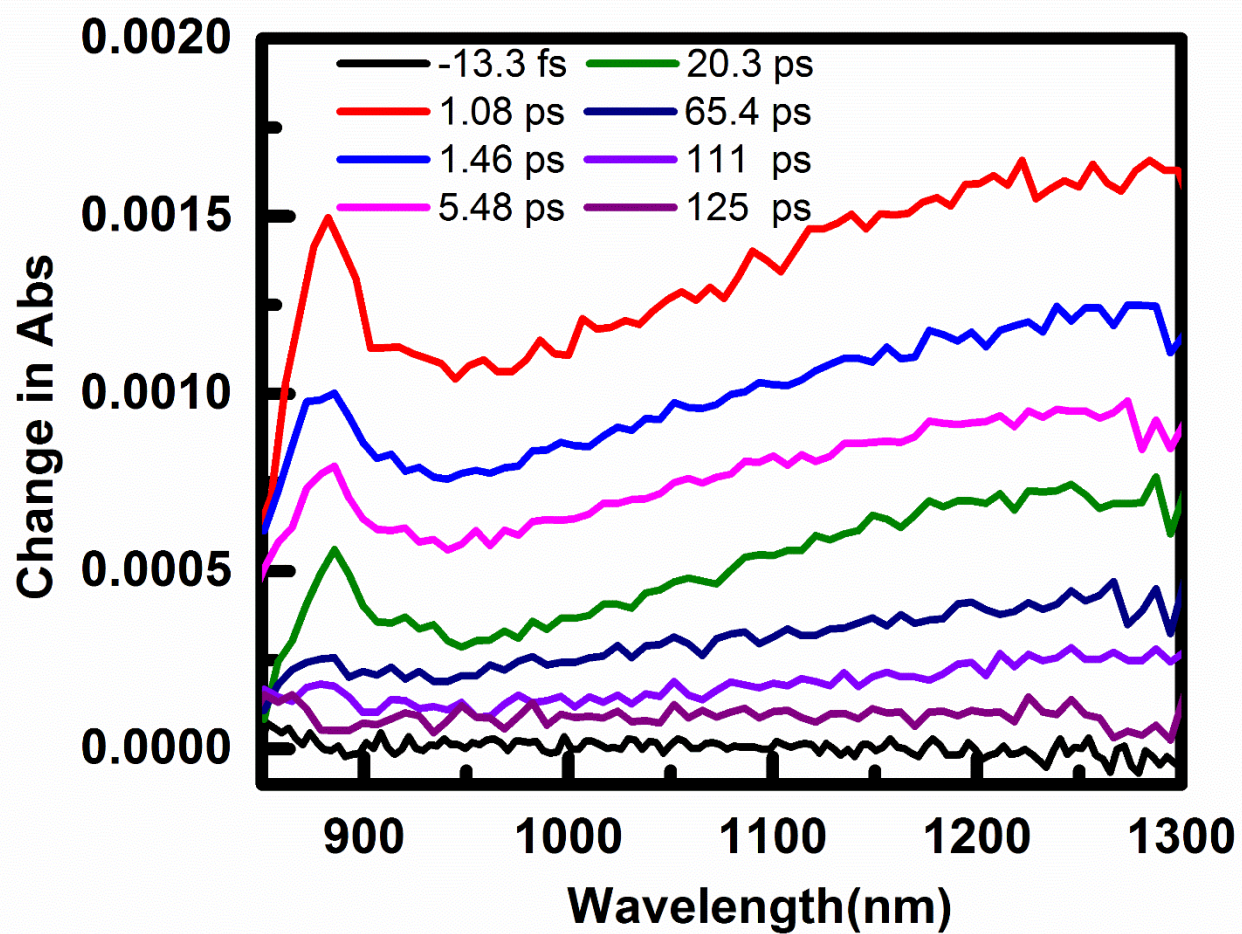

Fig S6. Femtosecond TA of TMPyP-CD-GC after excitation at 475 nm



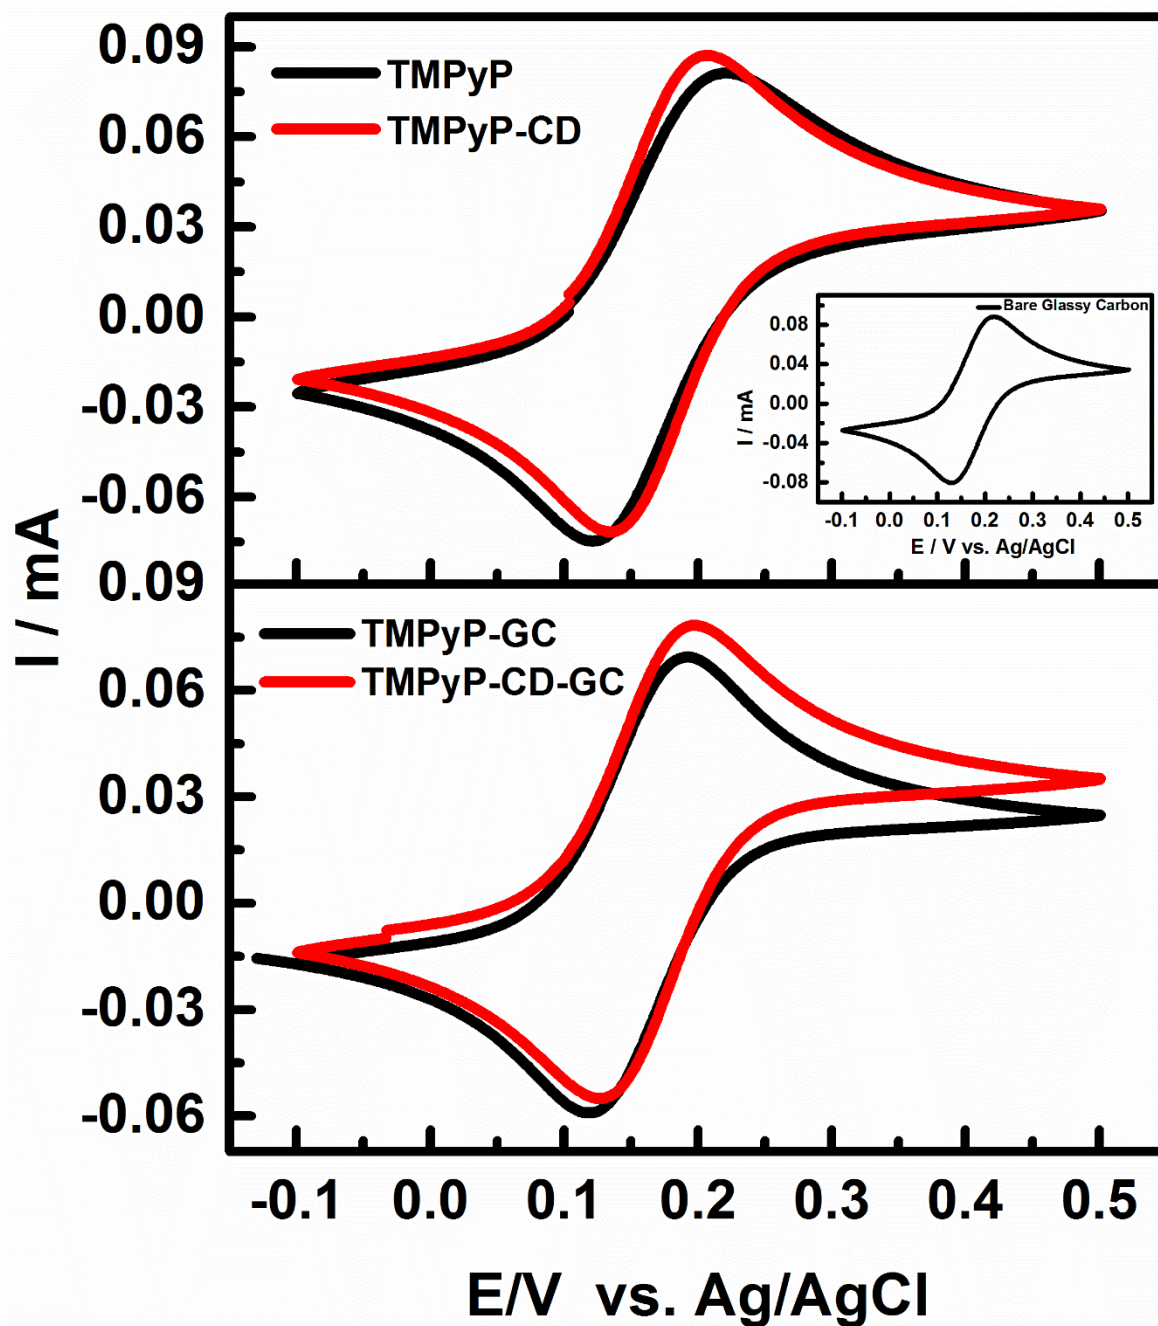

Fig S7. Cyclic Voltammetry results for: Upper panel) TMPyP (black) and TMPyP-CD (red); Lower panel) TMPyP-GC (black) and TMPyP-CD-GC (red)

References:

- (1) N. Blom, J. Odo, K. Nakamoto, D. P. Strommen, *J. Phys. Chem.* 1986, **90**, 2847-2852.
- (2) J. Qu, D.P. Arnold and P.M. Fredericks, *J. Raman Spectrosc.* 2000, **31**, 469-473
